# Supplementary material
Source: MDPI journal article supplement (https://www.mdpi.com/2071-1050/10/2/333)
Supplement: s1 [file s1]

## Sheet: Sheet1
Year	Province	The number of health technicians (HT)	The number of Licensed Doctors (LD)	The number of Registered Nurses (RN)	Government health expenditure	Social health expenditure	Population	Outpatient services	Inpatient services	The number of Graduates
		Unit: Person	Unit: Person	Unit：Person	Unit：million yuan	Unit：million yuan	Unit：10 thousands	Unit: Times	Unit: Times	Unit: Person
2014	Beijing	213245	79949	88488	394.38	890.57	2152	142353654	2698052	2722
2014	Tianjin	84880	33340	31577	171.18	266.71	1517	70202459	1486666	7427
2014	Hebei	351513	157725	121845	458.64	558.25	7384	111609913	9806432	30660
2014	Shanxi	209474	89835	79055	250.19	266.84	3648	47978821	3912808	10136
2014	Neimenggu	154483	62182	56723	240.81	190.85	2505	42152501	3004669	4146
2014	Liaoning	256284	101636	105828	289.38	561.3	4391	87353158	6351546	16965
2014	Jilin	151427	63234	57433	212.13	244.42	2752	48089015	3355237	8214
2014	Heilongjiang	212207	81371	77720	242.6	353.75	3833	60568802	4895691	12933
2014	Shanghai	164054	61202	71929	275.29	791.87	2426	140295558	3185533	3377
2014	Jiangsu	458503	178551	188767	581.99	1289.48	7960	230031286	11520434	17072
2014	Zhejiang	375902	145725	145141	443.89	910.59	5508	239369386	7562762	12041
2014	Anhui	268039	103742	111497	434.77	440.5	6083	90072577	8213618	21528
2014	Fujian	206516	75324	85664	296.48	407.52	3806	93391548	5337142	12181
2014	Jiangxi	201362	74647	84140	358.98	240.42	4542	56925557	6966492	12192
2014	Shandong	603785	230883	245711	619.7	1039.5	9789	179569291	15018236	41301
2014	Henan	494815	189335	191117	612.55	533.89	9436	158836162	14471027	29374
2014	Hubei	335583	126123	144109	415.91	465.85	5816	112184081	10534537	10259
2014	Hunan	341404	133372	136247	434.09	471.1	6737	85611712	12266254	18315
2014	Guangdong	583009	216799	233483	803.78	1236.96	10724	352974764	13928432	21945
2014	Guangxi	258599	86525	103955	359.27	294.79	4754	83216697	8327839	12695
2014	Hainan	50580	17609	22383	88.92	75.22	903	15698371	970976	2417
2014	Chongqing	154278	58084	62739	255.09	320.2	2991	55123580	5513272	10770
2014	Sichuan	451938	179523	175520	592.32	688.86	8140	152745099	15087855	16523
2014	Guizhou	169963	57845	67204	310.36	161.37	3508	44806611	6401353	14234
2014	Yunnan	208905	75426	82823	359.63	271.81	4714	83429887	7285484	9846
2014	Xizang	12882	5609	2715	57.53	19.11	318	4767555	229261	270
2014	Shaanxi	252611	76460	97221	317.92	423.52	3775	69012638	5956741	9776
2014	Gansu	126396	47681	45472	212.32	164.19	2591	37595666	3386090	3824
2014	Qinghai	33936	12953	12750	87.25	46.67	583	10434487	864753	951
2014	Ningxia	39800	15023	15096	67.56	71.22	662	16785159	964376	1304
2014	Xinjiang	153417	54805	59792	232.5	325.41	2298	48883927	4908250	4533
2013	Beijing	203741	77114	83879	356.42	708.36	2115	132793370	2333340	3021
2013	Tianjin	81083	32059	29715	145.31	212.38	1472	63054440	1235287	7071
2013	Hebei	333032	150144	111526	429.83	440.62	7333	100619011	7065098	29653
2013	Shanxi	203385	88182	74849	229.62	235.75	3630	44788099	2984958	9593
2013	Neimenggu	148202	62055	52358	223	208.31	2498	38621815	2314216	4016
2013	Liaoning	254692	103344	103409	263.26	471.8	4390	84130372	5137658	16402
2013	Jilin	145934	61998	52715	197.68	223.02	2751	44632156	2744227	8051
2013	Heilongjiang	207601	80475	73974	206.55	359.48	3835	57024151	3849907	12909
2013	Shanghai	157109	57944	67939	250.82	740.42	2415	129613363	2661650	2937
2013	Jiangsu	428894	169641	174158	549.23	1010.36	7939	212012371	8506519	15416
2013	Zhejiang	352466	138279	132705	393.16	750.8	5498	221748355	6224210	12323
2013	Anhui	253532	98613	103404	415.45	381.54	6030	79951417	5592380	20878
2013	Fujian	197545	72642	79929	268.01	330.72	3774	87721919	3908998	11383
2013	Jiangxi	190092	70251	78209	325.75	191.81	4522	52727598	3975255	11116
2013	Shandong	596987	231754	240078	571.45	874.71	9733	165802250	10298330	38835
2013	Henan	468536	180600	176534	561.33	443.38	9413	142764555	9419662	28378
2013	Hubei	309343	117191	127871	368.37	397.23	5799	100468795	6478724	9682
2013	Hunan	323082	127241	125696	392.91	380.71	6691	77657028	7205448	16526
2013	Guangdong	553728	210306	217629	667.69	1049.98	10644	334591803	9874294	21139
2013	Guangxi	240892	83310	94814	322.49	267.91	4719	77520402	4385131	11803
2013	Hainan	48108	16725	20892	77.4	59.92	895	14741315	744333	2136
2013	Chongqing	142133	55141	55460	226.79	253.79	2970	49337226	3028534	10145
2013	Sichuan	426988	173890	158457	546.11	556.02	8107	138628939	9079968	17025
2013	Guizhou	155905	55959	58666	278	124.77	3502	40631643	4068698	12468
2013	Yunnan	193217	74860	73305	322.14	241.43	4687	76320193	4911831	8649
2013	Xizang	11638	5176	2397	47.56	20.75	312	4324188	157089	216
2013	Shaanxi	239054	74397	89551	293.96	327.87	3764	64328287	4413908	7462
2013	Gansu	118089	44887	40954	188.17	141.28	2582	34518723	2416011	5296
2013	Qinghai	32431	13239	11492	78.1	43.06	578	9694611	635691	1133
2013	Ningxia	37288	14317	13978	60.44	48.91	654	15507992	806659	1282
2013	Xinjiang	145851	53020	56578	208.68	269.55	2264	45500485	3616321	4904
2012	Beijing	196234	74380	79534	320.4	600.96	2069	120552359	2250095	3022
2012	Tianjin	77076	30690	27621	120.9	184.37	1413	57457523	1321499	6595
2012	Hebei	314933	142989	101988	368.32	353.03	7288	92357191	8696025	23202
2012	Shanxi	199601	87319	70337	206.68	222.7	3611	41917976	3490607	9703
2012	Neimenggu	139876	59528	46774	204.46	175.21	2490	34944390	2586255	3114
2012	Liaoning	246808	100972	98036	233.02	382.73	4389	78210954	5504358	14968
2012	Jilin	144065	61400	50975	174.02	177.75	2750	42251478	3024452	7695
2012	Heilongjiang	201155	78589	70073	191	279.84	3834	53447453	4200879	11628
2012	Shanghai	147807	55797	63245	232.49	646.51	2380	123120190	2767289	2600
2012	Jiangsu	395961	157902	155247	483.75	863.51	7920	193682316	9528969	15649
2012	Zhejiang	329565	129973	121313	342.67	689.32	5477	206407088	6263527	12442
2012	Anhui	236188	92061	95046	365.75	300.83	5988	72528236	7116535	19977
2012	Fujian	176074	66740	71124	222.81	263.37	3748	81756765	5101566	9984
2012	Jiangxi	179705	67077	72055	269.45	175.06	4504	50820530	6578688	9798
2012	Shandong	530082	200465	191721	498.38	726.42	9685	152237400	13974795	35255
2012	Henan	428508	167608	156041	489.46	381.86	9406	131078265	12731364	23160
2012	Hubei	288695	109149	115745	305.89	335.88	5779	94703772	8620798	8387
2012	Hunan	296857	116440	112906	338.82	305.35	6639	71124316	10534202	15482
2012	Guangdong	518414	198966	199534	587.32	858.11	10594	317770542	12157959	19783
2012	Guangxi	220761	78043	85515	286.69	235.55	4682	72165432	6995176	12131
2012	Hainan	45060	15525	19432	66.82	59.45	887	14018373	841516	2223
2012	Chongqing	131658	51990	49823	195.56	204.8	2945	45097443	4497381	8842
2012	Sichuan	389440	162877	139810	473.89	467.31	8076	128177968	13831118	15060
2012	Guizhou	129772	49179	48646	242.62	97.97	3484	34640043	5633205	11358
2012	Yunnan	166764	68466	60755	288.23	211.84	4659	70068876	6211754	6582
2012	Xizang	9336	4043	1732	43.49	15.78	308	3172647	145468	174
2012	Shaanxi	216293	69471	79390	257.49	276.12	3753	59727717	4979226	7127
2012	Gansu	111609	42956	37202	168.88	113.94	2578	32916986	2928980	4310
2012	Qinghai	29311	11918	10026	61.72	42.26	573	9080987	759556	692
2012	Ningxia	34250	13011	12504	51.8	36.51	647	14105079	819980	1136
2012	Xinjiang	136691	50540	52449	190	224.26	2233	42075800	4477762	4730
